# Supplementary material
Source: Springer Nature journal article supplement (https://www.springermedizin.de/resource/supplementary/13075_2006_1958_MOESM1_ESM.pdf/9690974)
Supplement: MOESM1 [file 9690974]

## Additional file 1: WHO classification for lupus nephritis

| <b>Class</b> | <b>Designation</b>              | <b>Comment</b>                                                                                                                                                               |
|--------------|---------------------------------|------------------------------------------------------------------------------------------------------------------------------------------------------------------------------|
| I            | Normal                          | No evidence of lupus nephritis on the kidney biopsy.                                                                                                                         |
| II           | Mesangial Nephritis             | Most mild form of lupus nephritis; typically responds completely to treatment with corticosteroids.                                                                          |
| III          | Focal Proliferative Nephritis   | Very early stage of more advanced lupus nephritis; typically treated with high doses of corticosteroids, with excellent outcome.                                             |
| IV           | Diffuse Proliferative Nephritis | Advanced stage of lupus nephritis with definite risk of loss of kidney function; typically treated with high doses of corticosteroids combined with immunosuppressive drugs. |
| V            | Lupus Membranous Nephropathy    | Generally associated with excessive protein loss and edema; typically treated with high doses of corticosteroids, with or without immunosuppressive drugs.                   |
